# Supplementary material
Source: publisher figshare collection journal article supplement (https://sage.figshare.com/ndownloader/files/13159979)
Supplement: Supplementary file [file 13159979]

***MADELUNG – BENIGN MULTIPLE SYMMETRIC LIPOMATOSIS***  
**QUESTIONNAIRE**

## MADELUNG – BENIGN MULTIPLE SYMMETRIC LIPOMATOSIS QUESTIONNAIRE

### INTERVIEWER

Date (dd/mm/yyyy): \_\_\_\_\_

Interviewer Name: \_\_\_\_\_

☐ (Introduction; Reason for Phone Call; Explanation of Study; Consent)

### IDENTIFICATION

|                             |  |
|-----------------------------|--|
| Last Name (and Maiden Name) |  |
| First Name                  |  |
| Address                     |  |
| Telephone Number            |  |
| E-mail Address              |  |
| Male/Female                 |  |
| DOB (dd/mm/yyyy)            |  |
| Ethnicity/Background        |  |

|                       |  |
|-----------------------|--|
| Name of Family Doctor |  |
| Contact Information   |  |

If research with your DNA reveals any medical condition relating to you, do you wish for your family doctor to be informed? ☐ Yes ☐ No

### GENERAL PHYSICAL

|                          |  |
|--------------------------|--|
| Height (cm)              |  |
| Weight (kg)              |  |
| Waist Circumference (cm) |  |
| Blood Pressure           |  |

### SOCIAL HISTORY

Smoking:

Have you ever smoked? If so, for how long (how many years) and how much did/do you smoke a day?

---

---

Alcohol Consumption:

Do you drink alcohol? If so, how much (per week)?

---

Can you describe your history of alcohol consumption in the past, particularly before/around the time of diagnosis of Madelung Disease/Lipomatosis?

---

**MEDICAL HISTORY**

**Madelung Lipomatosis:**

Do you have excessive weight gain or lumps around your neck, around your jawline/chin, or on the back (or anywhere else, such as your torso, waist, or lower back)?

Description (Size and Location):

---

---

---

Is it symmetrical, in that it is the same when comparing the left and right side of your body? If not, please further describe the location of weight gain/lumps in relation to either side of your body.

---

When did they first appear?

Have they progressively become worse/better, or changed in any way?

Description of Changes:

---

---

Is your skin red (erythematous) over the areas of weight gain/ lumps?

---

---

Is there any associated pain?

---

---

Have you experienced any stiffness or movement limitation in the area of weight gain/lumps?

---

---

Have you experienced any discomfort or difficulty swallowing (dysphagia)?

---

---

Any other associated symptoms or complications?

---

---

---

Can you describe your level of disability (if applicable) due to the condition?

---

---

---

**CARDIOVASCULAR, METABOLIC AND OTHER POSSIBLE COMPLICATIONS:**

**Hypertension:**

Do you have a history of high blood pressure? If yes, for how long?

Description: \_\_\_\_\_  
\_\_\_\_\_

**Dyslipidemia:**

Do you have a history of dyslipidemia, such as high cholesterol, high triglycerides, low HDL-C (high density lipoprotein – cholesterol), or high LDL-C (low density lipoprotein – cholesterol)?

Description: \_\_\_\_\_  
\_\_\_\_\_  
\_\_\_\_\_

**Cardiovascular disease:**

Do you have a history of heart disease, such a heart attack, chest pain (angina), stroke or transient ischemic attack (TIA), a balloon angioplasty or bypass surgery? If so, when?

Description: \_\_\_\_\_  
\_\_\_\_\_  
\_\_\_\_\_

**Diabetes:**

Have you ever been diagnosed with type 2 diabetes, non-insulin dependent diabetes, or prediabetes? If so, for how long?

Description: \_\_\_\_\_  
\_\_\_\_\_  
\_\_\_\_\_

**Hyperuricemia:**

Have you ever been diagnosed with hyperuricemia, gout, or chronic kidney disease? If so, when?

Description: \_\_\_\_\_  
\_\_\_\_\_  
\_\_\_\_\_

**Renal Tubular Acidosis:**

Have you ever been diagnosed with renal tubular acidosis, or any other kidney disease? If so, when?

Description: \_\_\_\_\_  
\_\_\_\_\_  
\_\_\_\_\_

**Hepatic disease:**

Have you ever been diagnosed with any liver disease, such as fatty liver or cirrhosis? If so, when?

Description: \_\_\_\_\_  
\_\_\_\_\_  
\_\_\_\_\_

**Hypothyroidism:**

Have you ever been diagnosed with hypothyroidism? If so, when?

Description: \_\_\_\_\_  
\_\_\_\_\_  
\_\_\_\_\_

**Peripheral Neuropathy:**

Have you ever been diagnosed with peripheral neuropathy, or had any symptoms of muscle weakness or numbness/loss of sensation? If so, when?

Description: \_\_\_\_\_  
\_\_\_\_\_  
\_\_\_\_\_

Do you have any other medical conditions or health problems?

Description: \_\_\_\_\_  
\_\_\_\_\_  
\_\_\_\_\_  
\_\_\_\_\_  
\_\_\_\_\_

**MEDICATIONS:**

Please list your current and past medications, along with the dates they were started/stopped.

---

---

---

---

---

---

---

---

---

---

**SURGICAL/INTERVENTIONAL HISTORY:**

Have you ever undergone any of the following procedures/interventions? If so, please give further details, including the date, the reason for intervention, the result, and any complications (if applicable).

Liposuction (Lipoplasty)

---

---

---

---

Dermolipodectomy

---

---

---

---

Laserderm

---

---

---

---

Any Other Surgeries

---

---

---

---

Physiotherapy

---

---

Have you ever had any previous genetic testing done?

---

---

## **FAMILY HISTORY**

Do any of your family members have Madelung disease or a similar pattern of weight gain around their neck/shoulder area? If so, please specify who, and at what age they developed the condition.

---

---

---

---

---

---

---

---

---

---

---

---

Has anyone in your family had an early death, heart disease (i.e. a heart attack, angina, stroke or transient ischemic attack, balloon angioplasty or bypass surgery), or diabetes.?

---

---

---

---

---

---

Are there any other notable medical conditions that run in your family that you are aware of?

---

---

---

---

---

---

MTTK8344A.G PHENOTYPES

Do you or anyone in your family have any of the following? If yes, please describe.

Epilepsy/Seizures/Fits?

---

---

---

Jerky, spastic movements that you can't control?

---

---

---

Migraines/ Headaches? With vomiting? Difficulty concentrating?

---

---

---

Eye Issues/Vision Loss?

---

---

---

Hearing Loss?

---

---

---

Memory Loss?

---

---

---

Muscle Weakness? (In the hands/feet? Difficulty standing from sitting/squatting position?)

---

---

---

Issues with coordination?

---

---

---

Issues conducting fine movements?

---

---

---

Overly curved arch of feet?

---

---

---
